# Supplementary material for: Adaptation of the Transverse Carpal Ligament Associated with Repetitive Hand Use in Pianists
Source: PLoS One. 2016 Mar 8;11(3):e0150174. doi: 10.1371/journal.pone.0150174 (PMC4783057; doi:10.1371/journal.pone.0150174)
Supplement: S1 File — (XLSX) [file pone.0150174.s001.xlsx]

## Sheet: Data Summary
Table A
Non-Pianists
Subject Number	Subject Information								Transverse Carpal Ligament Shear Wave Velocity
	Age (years)	Height (inches)	Weight (lbs)	BMI (kg/m2)	Texting (min/day)	Computer (min/day)	Piano (hours/week)	Piano (years)	RIGHT HAND			LEFT HAND			RIGHT-LEFT HAND AVERAGED
									Total TCL (m/s)	uTCL (m/s)	rTCL (m/s)	Total TCL (m/s)	uTCL (m/s)	rTCL (m/s)	Total TCL (m/s)	uTCL (m/s)	rTCL (m/s)	rTCL/uTCL (m/s)
1	23	66.75	145	22.8781	90	15	0	0	4.60647	4.30907	4.5498	4.42238	4.8613	4.2383	4.51443	4.58519	4.39405	0.958314
2	22	66	125	20.1733	60	60	0	0	6.33398	6.37648	7.0066	6.41892	5.61182	6.94287	6.37645	5.99415	6.97474	1.16359
3	31	65	120	19.9669	60	360	0	0	5.14452	4.6206	5.37108	4.8802	4.65367	4.93683	5.01236	4.63713	5.15395	1.11145
4	19	62	100	18.2882	60	150	0	0	5.272	4.2241	4.04005	4.62063	4.1958	4.08255	4.94631	4.20995	4.0613	0.964691
5	22	68	127	19.3082	90	450	0	0	5.05955	3.89845	5.38528	5.16645	4.53563	5.14453	5.113	4.21704	5.2649	1.24848
6	22	64	112	19.2227	30	360	0	0	4.18165	3.37453	4.88965	4.67725	4.49317	4.74805	4.42945	3.93385	4.81885	1.22497
7	23	62	116	21.2144	60	360	0	0	5.6826	4.71972	5.39942	5.24367	4.88255	4.9038	5.46314	4.80114	5.15161	1.073
8	25	64	123	21.1106	60	180	0	0	4.7339	4.0896	4.84718	5.10205	5.14452	5.6118	4.91798	4.61706	5.22949	1.13264
9	28	62	130	23.7747	5	180	0	0	4.7339	4.42235	4.90382	5.09495	3.71437	4.1533	4.91442	4.06836	4.52856	1.11312
10	23	64	110	18.8794	5	480	0	0	4.47897	4.06835	4.49317	4.42238	4.2666	4.07545	4.45068	4.16748	4.28431	1.02804
Average	23.8	64.375	120.8	20.4816	52	259.5	0	0	5.02275	4.41033	5.0886	5.00489	4.63594	4.88375	5.01382	4.52313	4.98618	1.10183
SD	3.4254	2.08583	12.39	1.77076	30.0185	163.103	0	0	0.630372	0.789196	0.804118	0.582081	0.530491	0.888515	0.577362	0.590592	0.822112	0.0985086
Table B
Pianists
Subject Number	Subject Information								Transverse Carpal Ligament Shear Wave Velocity
	Age (years)	Height (inches)	Weight (lbs)	BMI (kg/m2)	Texting (min/day)	Computer (min/day)	Piano (hours/week)	Piano (years)	RIGHT HAND			LEFT HAND			RIGHT-LEFT HAND AVERAGED
									Total TCL (m/s)	uTCL (m/s)	rTCL (m/s)	Total TCL (m/s)	uTCL (m/s)	rTCL (m/s)	Total TCL (m/s)	uTCL (m/s)	rTCL (m/s)	rTCL/uTCL (m/s)
1	21	61	93	17.5703	10	120	10	14	6.58887	4.76223	6.53225	4.88965	4.3091	4.9463	5.73926	4.53566	5.73928	1.26537
2	19	64	180	30.8936	60	60	42	15	6.20655	5.5127	6.6526	6.0508	5.5906	6.82958	6.12867	5.55165	6.74109	1.21425
3	19	62	128	23.4089	10	180	14	11	4.50023	4.83303	4.23825	5.37107	3.58693	6.92873	4.93565	4.20998	5.58349	1.32625
4	18	62	110	20.1171	30	120	10	12	6.20655	5.30027	7.19775	6.03662	3.82055	7.3252	6.12159	4.56041	7.26148	1.59228
5	20	66	117	18.8822	60	60	50	14	5.05505	4.15332	5.55518	4.69142	5.45607	4.52147	4.87324	4.8047	5.03833	1.04862
6	21	68	150	22.8049	30	240	20	18	5.6203	5.42774	6.26032	4.76222	4.30907	6.36228	5.19126	4.86841	6.3113	1.29638
7	23	63	120	21.2547	60	120	10	8	6.20655	5.71802	7.03495	5.2956	4.74807	5.52217	5.75108	5.23305	6.27856	1.19979
8	19	65	136	22.6291	60	60	10	11	5.49852	4.28078	6.27025	5.5552	5.05958	6.03662	5.52686	4.67018	6.15344	1.3176
9	22	65	145	24.1266	60	360	10	15	6.06495	6.31982	6.41187	5.49852	3.70018	5.96583	5.78174	5.01	6.18885	1.2353
10	22	65	140	23.2947	45	360	10	10	5.28612	4.92505	6.0791	5.08788	4.9746	5.19412	5.187	4.94983	5.63661	1.13875
Average	20.4	64.1	131.9	22.4982	42.5	168	18.6	12.8	5.72337	5.1233	6.22325	5.3239	4.55547	5.96323	5.52363	4.83939	6.09324	1.26346
SD	1.64655	2.13177	24.1911	3.64058	20.9828	115.931	14.9086	2.93636	0.646466	0.663797	0.838969	0.481106	0.721156	0.919009	0.457166	0.380132	0.631192	0.143396
